# Supplementary material for: Tissue-engineered 3-dimensional (3D) microenvironment enhances the direct reprogramming of fibroblasts into cardiomyocytes by microRNAs
Source: PubMed Central journal article supplement (PMC5150639; doi:10.1038/srep38815), 2016-12-12

## SUPPLEMENTARY

### **Tissue-engineered 3-dimensional (3D) microenvironment enhances the direct reprogramming of fibroblasts into cardiomyocytes by microRNAs.**

Yanzhen Li, Sophie Dal-Pra, Maria Mirotsoy, Tilanthi M. Jayawardena, Conrad P. Hodgkinson, Nenad Bursac, Victor J. Dzau

#### **Supplementary Figures**

**Supplementary Figure 1. Design of the 3D tissue bundles.** (A) Fibroblasts were mixed in a fibrin/matrigel matrix and then cast into wells of PDMS molds and anchored to nylon frames. After one day of compaction, frames with bundles were removed for free-floating culture. (B) Representative live images of 2-week old bundles with fibroblasts transfected with either Neg miR or miR combo. (C) Quantification of bundle diameters (N=7). \*\*\*\* P < 0.0001.

**Supplementary Figure 2. miR combo reduces passive force in 3D cultures.** Passive force-length relationships in 3D tissue bundles made of fibroblasts transfected with negative control miR (negmiR) or miR combo and cultured for 14 days (N=3). \* P<0.05 between negmiR and miR combo. Passive force-length of a neonatal rat ventricular myocytes (NRVMs) enriched population is provided by way of comparison.

#### **Supplementary Figure 3. miR combo reprogramming in Fsp1+ fibroblasts.** (A)

Representative immunostaining images of neonatal mouse cardiac fibroblasts derived from Fsp1Cre:tdTomato mice transfected with miR combo and cultured for 14 days in 2D or 3D environment. (B) Quantitative comparison of cTnT/TdTomato and SAA/TdTomato expressing

cells in 2D and 3D culture. \*  $P < 0.05$ , \*\*  $P < 0.01$ . Comparisons made between 2D and 3D groups.

**Supplementary Figure 4. Gene expression in 3D vs. 2D culture environment.** Expressions of 84 genes important for cell-cell and cell-matrix interactions were assessed using a qPCR array (RT<sup>2</sup> Profiler™ PCR Array Mouse Extracellular Matrix & Adhesion Molecules, QIAGEN) in 14-day 2D and 3D cultures of miR combo transfected cardiac fibroblasts. Table and graph show the genes with significantly ( $p < 0.05$ ) upregulated expression in 3D compared to 2D environment.

**Supplementary Figure 5. MMP inhibition blocks the effect of the 3D environment upon cardiac reprogramming.** Neonatal cardiac fibroblasts were transfected with negative control miR (negmiR) or miR combo. Two days after transfection cells were re-plated either in regular culture dishes (2D) or encapsulated in a 3D hydrogel (3D). Cells were cultured for a further 14 days in the presence of vehicle or 5  $\mu$ M BB94 (a broad spectrum MMP inhibitor). Cardiac gene expression was analyzed by qPCR. N=3, comparisons were not significant.

## Supplementary Figure 1

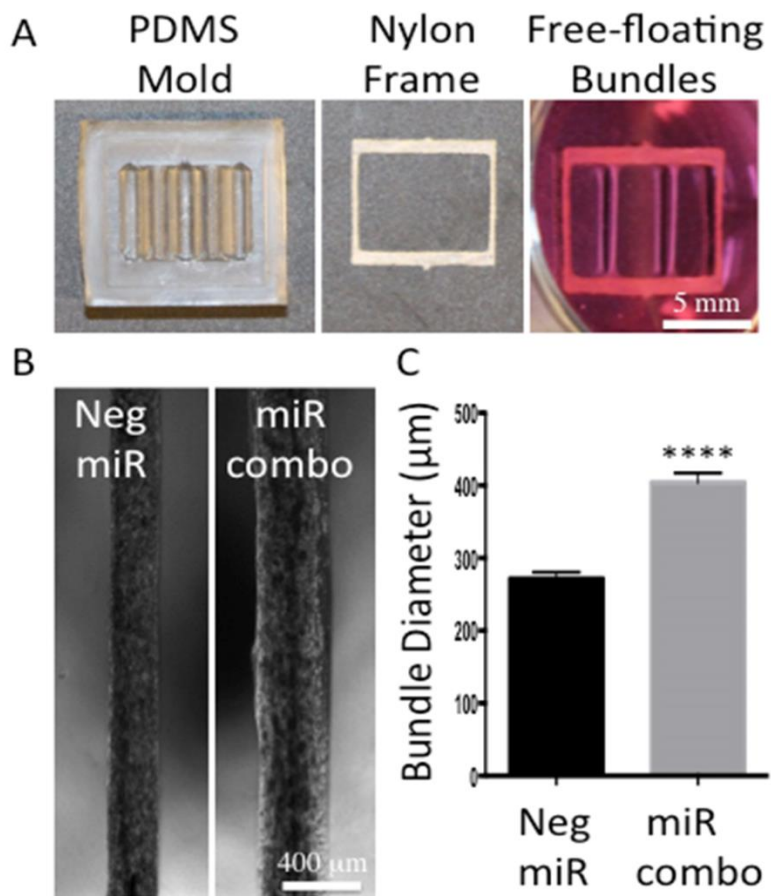

## Supplementary Figure 2

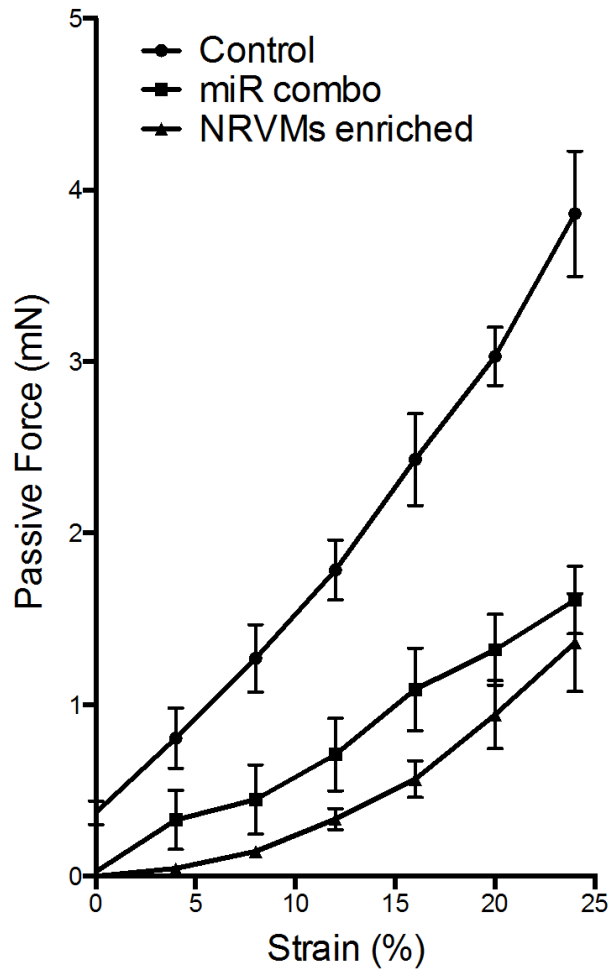

## Supplementary Figure 3

2D-miR combo

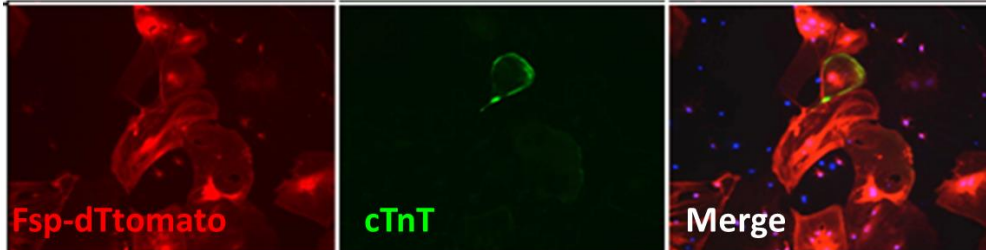

3D-miR combo

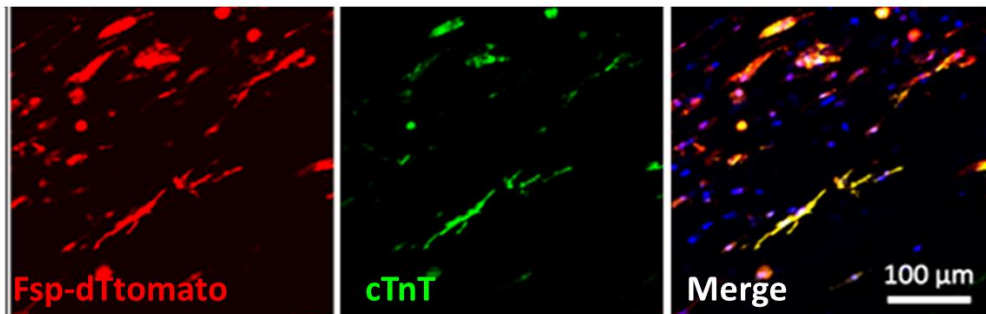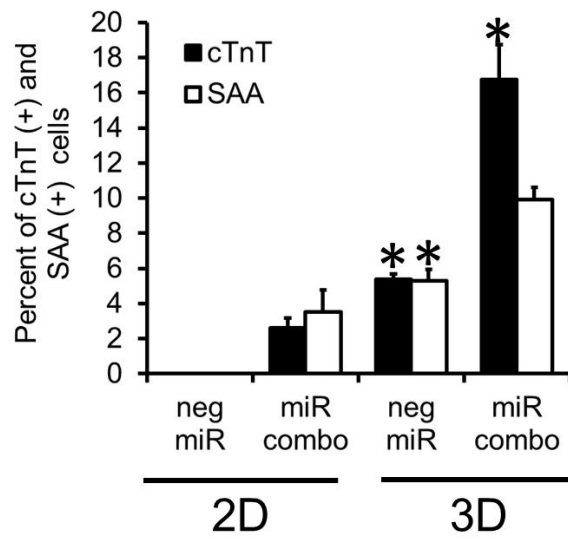

## Supplementary Figure 4

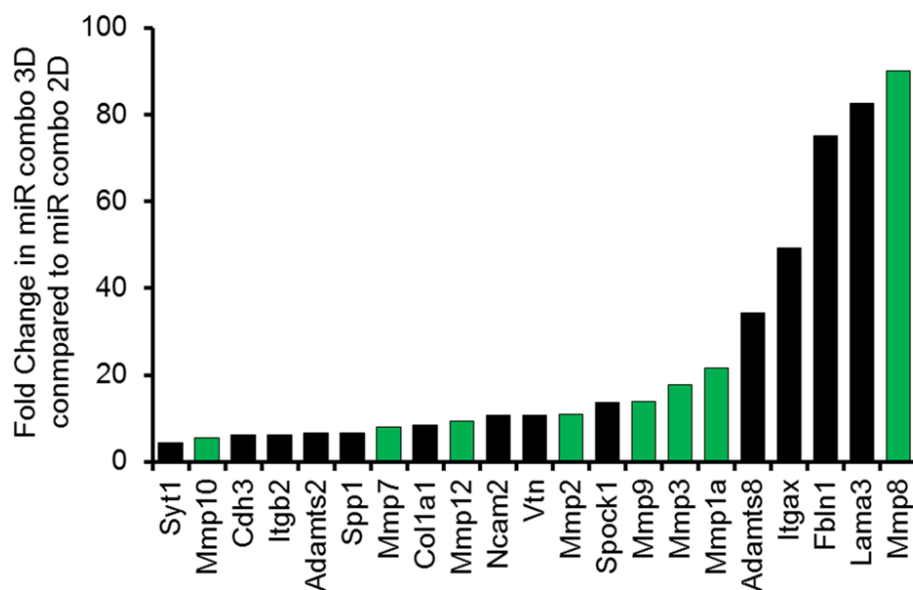

| Gene Name    | Fold change<br>miR combo 3D vs<br>miR combo 2D |
|--------------|------------------------------------------------|
| Syt1         | 4.3517                                         |
| <b>Mmp10</b> | <b>5.5094</b>                                  |
| Cdh3         | 6.0892                                         |
| Itgb2        | 6.2255                                         |
| Adamts2      | 6.609                                          |
| Spp1         | 6.6848                                         |
| <b>Mmp7</b>  | 7.9427                                         |
| Col1a1       | 8.4255                                         |
| <b>Mmp12</b> | <b>9.2822</b>                                  |
| Ncam2        | 10.5986                                        |
| Vtn          | 10.5986                                        |
| <b>Mmp2</b>  | <b>10.9829</b>                                 |
| Spock1       | 13.7507                                        |
| <b>Mmp9</b>  | <b>13.9811</b>                                 |
| <b>Mmp3</b>  | <b>17.7361</b>                                 |
| <b>Mmp1a</b> | <b>21.5201</b>                                 |
| Adamts8      | 34.1876                                        |
| Itgax        | 49.3464                                        |
| Fbln1        | 74.9954                                        |
| Lama3        | 82.4821                                        |
| <b>Mmp8</b>  | <b>90.0245</b>                                 |

# Supplementary Figure 5

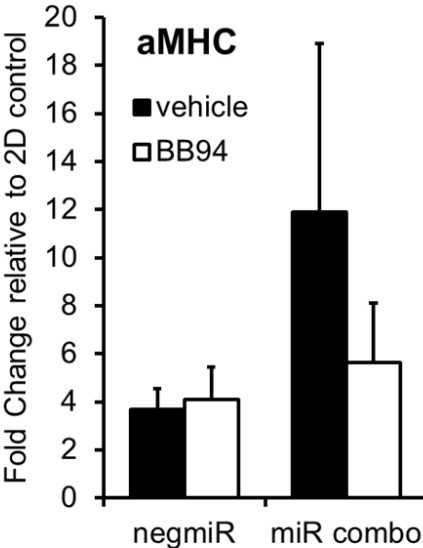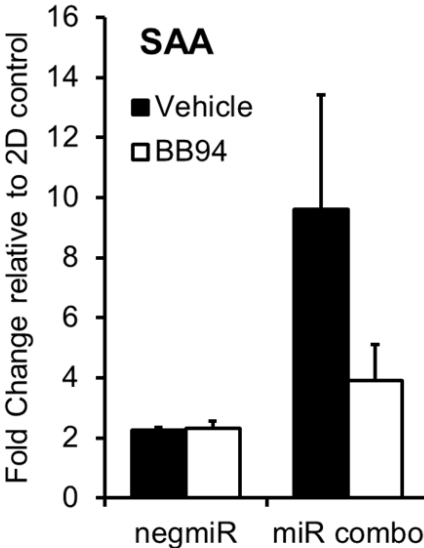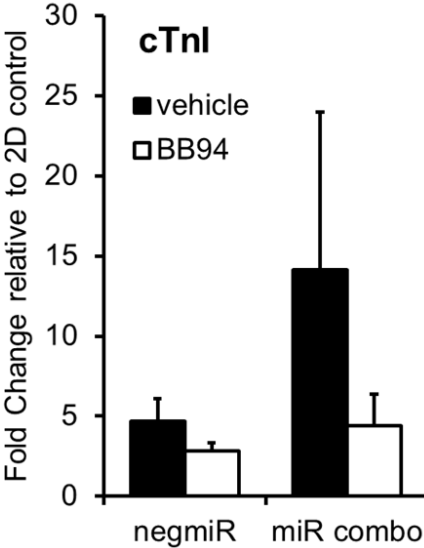

Supplement: srep38815-s1.pdf [file srep38815-s1.pdf]
